# Supplementary material for: In situ metal-ion-incorporated photothermal GO films with an adjustable temperature range for personal thermal management
Source: Royal Society of Chemistry journal article supplement (doi:10.1039/d4ce00547c), 2024-01-01
Supplement: d4ce00547c1.pdf [file d4ce00547c1.pdf]

## **In-situ metal-ion-incorporated photothermal GO films with adjustable temperature range for personal thermal management**

Wan-Peng Chen,<sup>a</sup> Yan-Mei Zhu,<sup>a</sup> Yu-Ping Du,<sup>b</sup> Xing-Bin Lv,<sup>\*a</sup> Hai-Rong Yu,<sup>a</sup> Ting Liang,<sup>a</sup>

Chang-Jing Cheng<sup>a</sup> and Jun-Yi Ji<sup>b</sup>

<sup>a</sup> College of Chemistry and Environment, Southwest Minzu University, Chengdu, Sichuan, 610041, P. R. China.

<sup>b</sup> School of Chemical Engineering, Sichuan University, Chengdu, Sichuan, 610065, P. R. China.

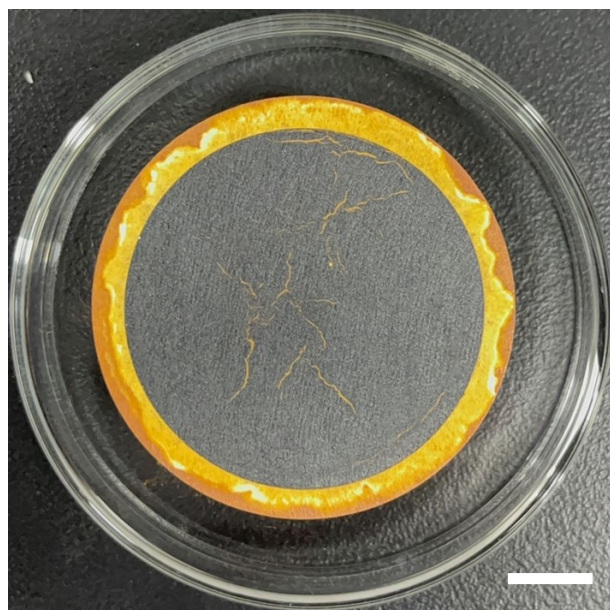

**Fig. S1** The optical photograph of GO-Fe-0.4 film. Scale bar is 1 cm.

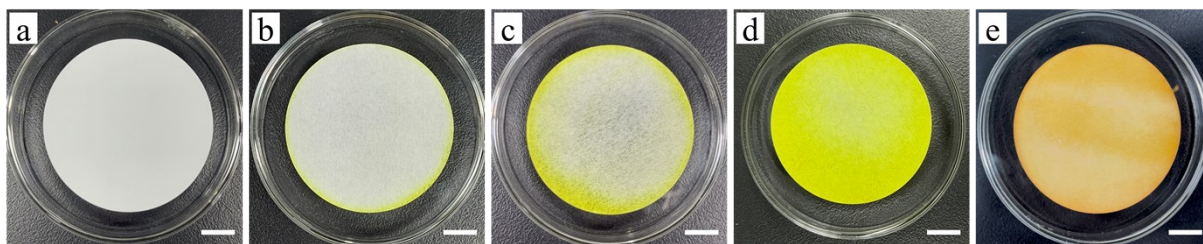

**Fig. S2** Optical photographs of CNCA substrate films soaked in different concentrations of iron ion solutions after drying. Scale bars are 1 cm.

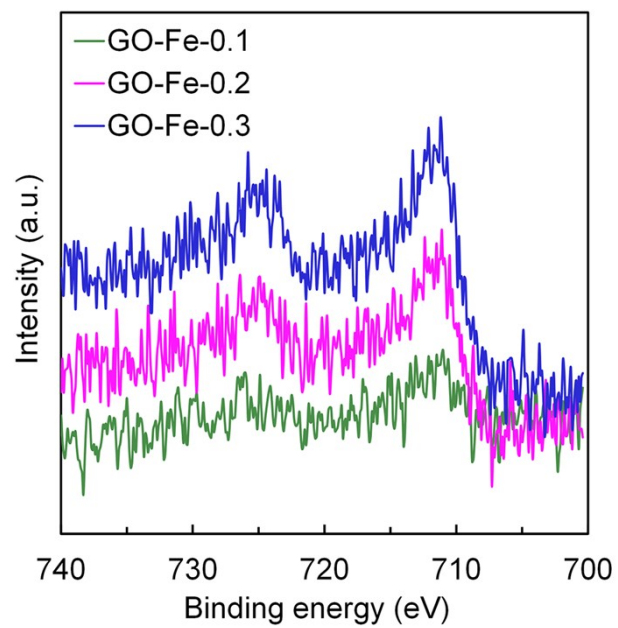

**Fig. S3** The high-resolution Fe 2p spectra of GO-Fe-*c* films.

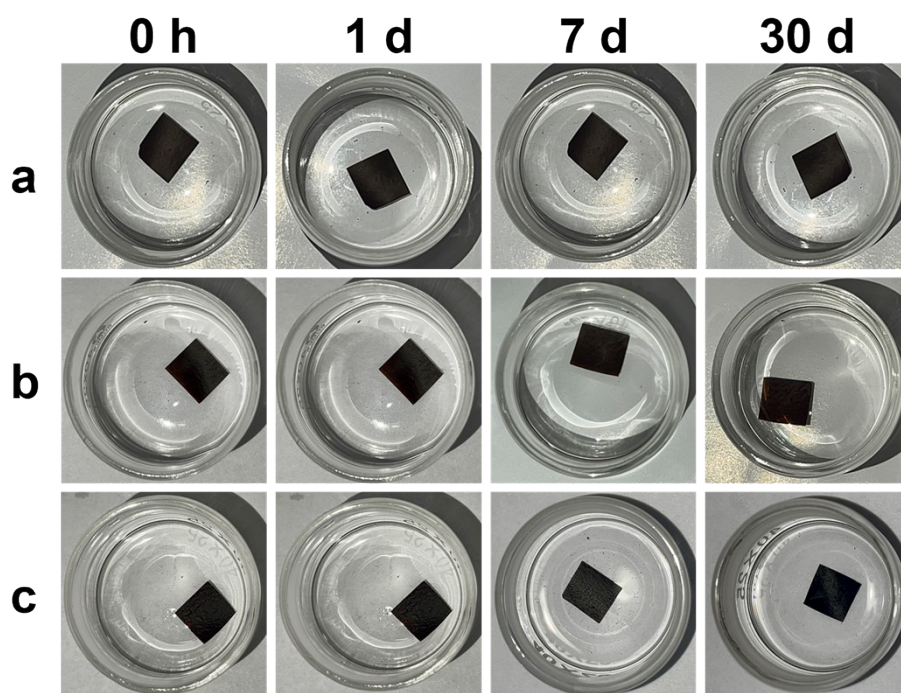

**Fig. S4** Stability of (a1) GO-Mg-0.2 film, (a2) GO-Al-0.2 film and (a3) GO-Ca-0.2 film after statically soaked in water for different time. Scale bar is 1 cm.

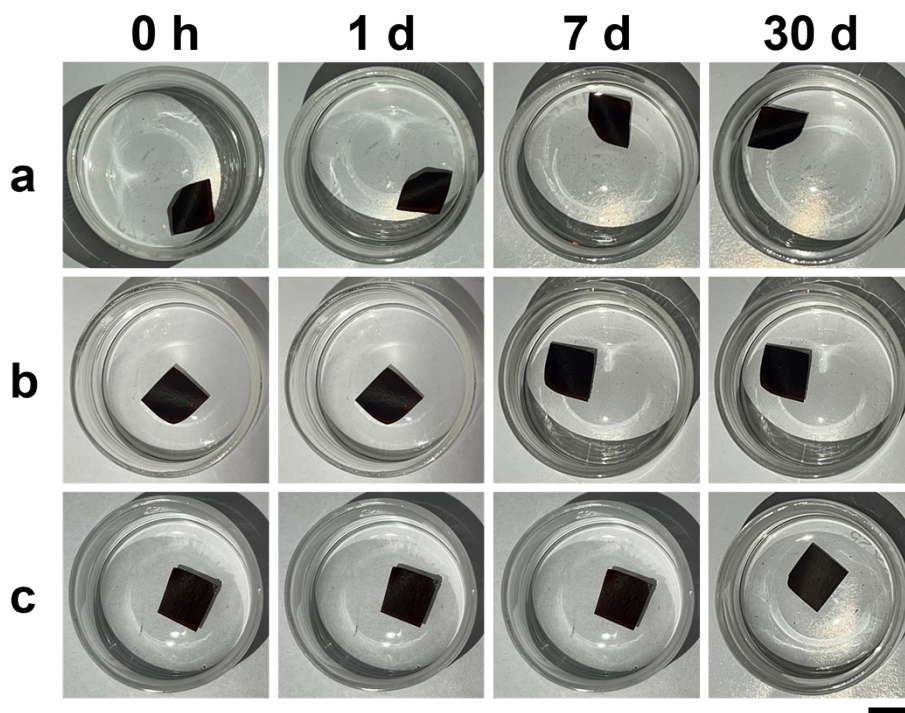

**Fig. S5** Stability of (a1) GO-Mg-0.2 film, (a2) GO-Al-0.2 film and (a3) GO-Ca-0.2 film after statically soaked in ethanol for different time. Scale bar is 1 cm.

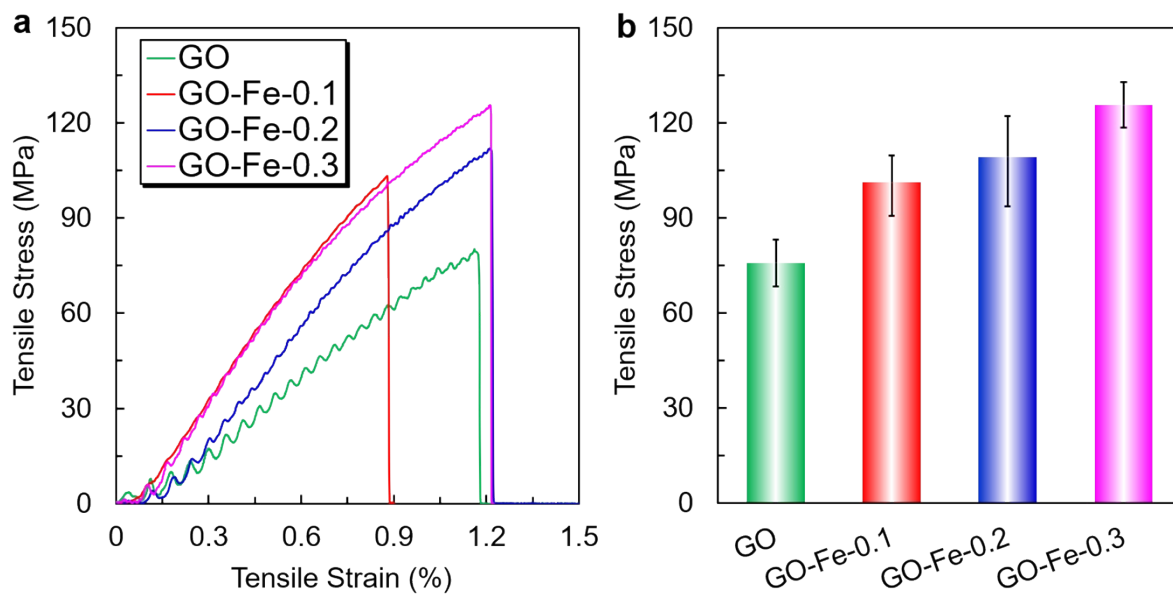

**Fig. S6.** Typical strain-stress curves (a) and tensile stress at break (b) of pure GO film and GO-Fe-*c* films.

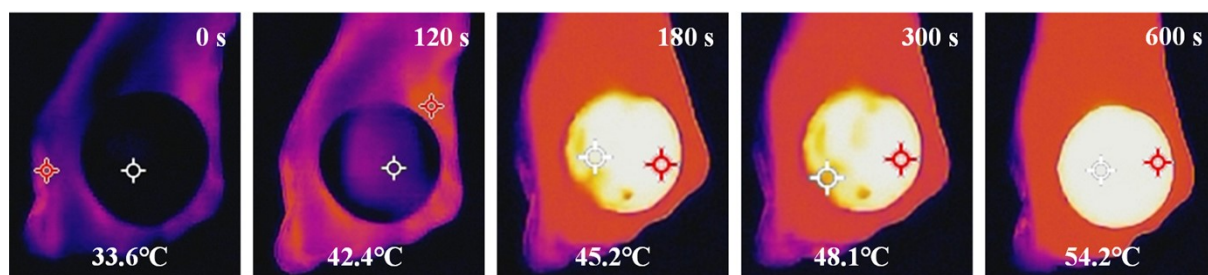

**Fig. S7.** Infrared thermal images of GO-Fe-0.3 film after exposure to actual sunlight for different periods of time (under 0.6 solar illumination).



**Table S1** EDS results of the element content in pure GO film and GO-Fe-*c* films.

| Sample    | C (at. %) | O (at. %) | Fe (at. %) |
|-----------|-----------|-----------|------------|
| GO        | 58.8      | 41.2      | 0          |
| GO-Fe-0.1 | 57.1      | 41.5      | 1.4        |
| GO-Fe-0.2 | 57.4      | 40.1      | 2.5        |
| GO-Fe-0.3 | 57.8      | 38.1      | 4.1        |

**Table S2** The areas of D and G peaks, and  $I_D/I_G$  values of Raman spectra.

| Sample    | Area of D peak | Area of G peak | $I_D/I_G$ |
|-----------|----------------|----------------|-----------|
| GO        | 481623         | 360482         | 1.34      |
| GO-Fe-0.1 | 929248         | 687708         | 1.35      |
| GO-Fe-0.2 | 313726         | 224000         | 1.40      |
| GO-Fe-0.3 | 566578         | 418438         | 1.35      |

**Table S3** EDS results of the element contents in GO-*M*-0.2 film samples.

| Sample    | C (at. %) | O (at. %) | M (at. %) |
|-----------|-----------|-----------|-----------|
| GO-Mg-0.2 | 59.1      | 40.5      | 0.4       |
| GO-Al-0.2 | 58.0      | 41.8      | 0.2       |
| GO-Ca-0.2 | 54.1      | 43.3      | 2.6       |

**Table S4** Comparison of temperature responses of GO-Fe-0.3 film with other similar materials under 1 solar irradiation

| Materials                     | Time          | Temperature    | Reference        |
|-------------------------------|---------------|----------------|------------------|
| GO/PVA EFMs                   | 0 min         | 23.4 °C        | 1                |
|                               | 30 min        | 54.6 °C        |                  |
|                               | 60 min        | 55.1 °C        |                  |
| GO/HN paper                   | 0 min         | 27.5 °C        | 2                |
|                               | 3 min         | 58.4 °C        |                  |
|                               | 10 min        | 62.5 °C        |                  |
| BC/PVA/GO-g-LA-SSPCMs         | 0 min         | 22.5 °C        | 3                |
|                               | 30 min        | 47.3 °C        |                  |
|                               | 60 min        | 47.4 °C        |                  |
| paraffin@TiO <sub>2</sub> /GO | 0 min         | 30.0 °C        | 4                |
|                               | 4000 s        | 92.0 °C        |                  |
| Si60                          | 0 min         | 25.0 °C        | 5                |
|                               | 0.5 min       | 69.8 °C        |                  |
|                               | 60 min        | 87.3 °C        |                  |
| BCSO                          | 0 min         | 20.0 °C        | 6                |
|                               | 10 min        | 91.4 °C        |                  |
|                               | 60 min        | 95.4 °C        |                  |
| TiN/GO//GOF                   | 5 min         | 30.6 °C        | 7                |
|                               | 25 min        | 35.4 °C        |                  |
|                               | 50 min        | 39.0 °C        |                  |
| AuNP/GO/ESM                   | 0 min         | 26.0 °C        | 8                |
|                               | 10 min        | 49.0 °C        |                  |
|                               | 60 min        | 49.5 °C        |                  |
| <b>GO-Fe-0.3</b>              | <b>0 min</b>  | <b>25.0 °C</b> | <b>This work</b> |
|                               | <b>5 min</b>  | <b>59.5 °C</b> |                  |
|                               | <b>10 min</b> | <b>61.2 °C</b> |                  |

## References

1. X. Guo, H. Gao, S. Wang, L. Yin and Y. Dai, *Desalination*, 2020, **488**, 114535.
2. Z.-C. Xiong, Y.-J. Zhu, D.-D. Qin and R.-L. Yang, *ACS Appl. Mater. Interfaces*, 2020, **12**, 32556-32565.
3. W. Dong, Y. Wang, Z. Zhang, H. Tao, T. Zhang, G. Meng, J. Wu and S. Jia, *J. Cleaner Prod.*, 2024, **445**, 141235.
4. Z. Li, H. Lei, A. Kan, H. Xie and W. Yu, *Energy*, 2021, **216**, 119262.
5. T. S. Shridharan, A. Sivanantham, J. H. Lee, S. Y. Hong, Y. J. Jeong, S. S. Shin and I. S. Cho, *Chem. Eng. J.*, 2024, **486**, 150247.
6. T. S. Shridharan, M. J. Kang, A. Sivanantham, S. Kim and I. S. Cho, *Desalination*, 2022, **540**, 115984.
7. Y. Du, J. Wen, K. Deng, L. Zou, X. Liu, P. Liu, B. Liu, X. Lv, W. Tian and J. Ji, *Sep.*

- Purif. Technol.*, 2023, **322**, 124312.
8. L. Wang, B. Tang, J. Zhou, H. Zhao, W. Chen and J. Wang, *Applied Sciences*, 2019, **9**, 4384.
